# Supplementary material for: Mechanochemical synthesis of air-stable hexagonal Li4SnS4-based solid electrolytes containing LiI and Li3PS4
Source: Royal Society of Chemistry journal article supplement (doi:10.1039/d1ra06466e), 2021-01-01
Supplement: d1ra06466e1.pdf [file d1ra06466e1.pdf]

## Supplementary information

# **Mechanochemical synthesis of air-stable hexagonal Li<sub>4</sub>SnS<sub>4</sub>-based solid electrolytes containing LiI and Li<sub>3</sub>PS<sub>4</sub>**

Misae Otoyama,\* Kentaro Kuratani, and Hironori Kobayashi

Research Institute of Electrochemical Energy, Department of Energy and Environment, National Institute of Advanced Industrial Science and Technology (AIST), 1-8-31, Midorigaoka, Ikeda, Osaka 563-8577, Japan

Research Institute of Electrochemical Energy, Department of Energy and Environment, National Institute of Advanced Industrial Science and Technology (AIST),

1-8-31, Midorigaoka, Ikeda, Osaka 563-8577, Japan

Tel.: +81-72-751-7932; Fax.: +81-72-751-9609

\*Correspondence to: [misae-otoyama@aist.go.jp](mailto:misae-otoyama@aist.go.jp)

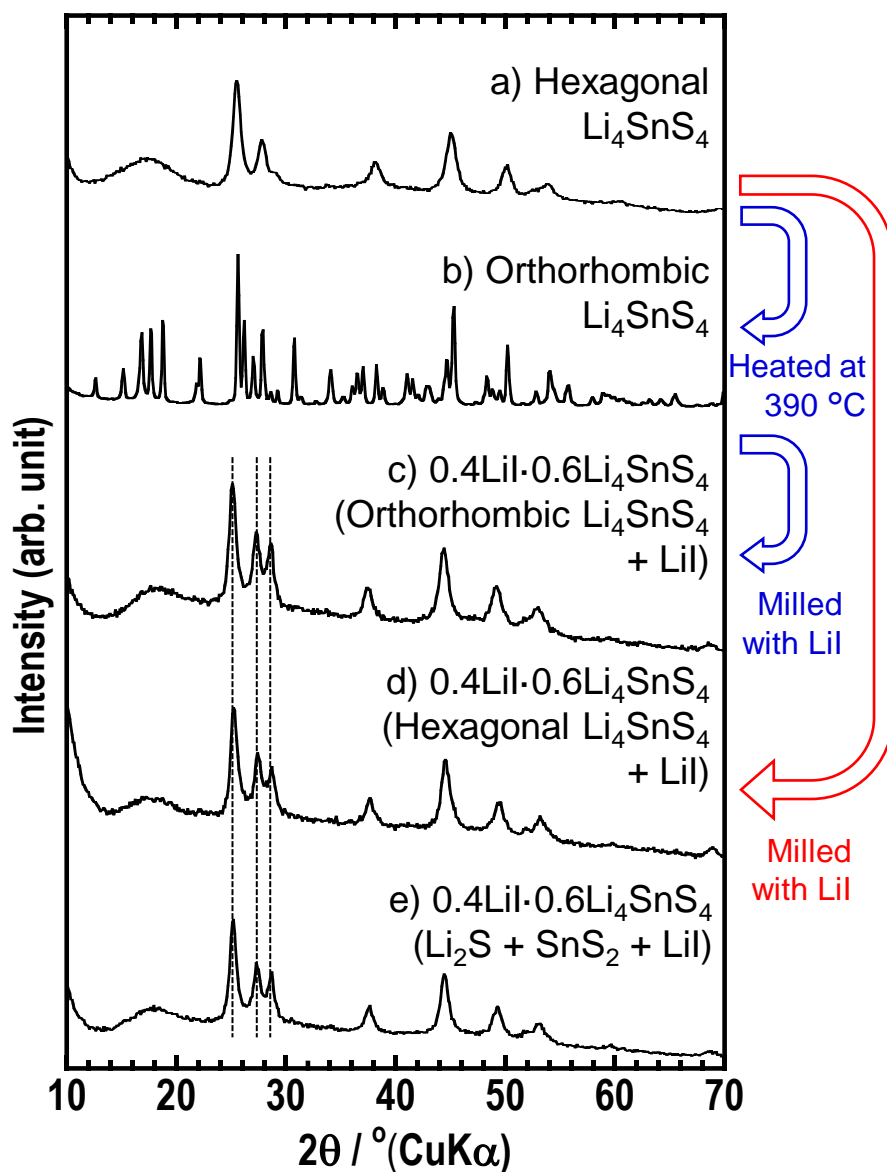

Fig. S1. XRD patterns of a) hexagonal  $\text{Li}_4\text{SnS}_4$ , b) orthorhombic  $\text{Li}_4\text{SnS}_4$  prepared by heat treatment of a) hexagonal  $\text{Li}_4\text{SnS}_4$  at 390 °C, c)  $0.4\text{LiI} \cdot 0.6\text{Li}_4\text{SnS}_4$  prepared by ball milling of b) orthorhombic  $\text{Li}_4\text{SnS}_4$  and LiI, d)  $0.4\text{LiI} \cdot 0.6\text{Li}_4\text{SnS}_4$  prepared by ball milling of a) hexagonal  $\text{Li}_4\text{SnS}_4$  and LiI, and e)  $0.4\text{LiI} \cdot 0.6\text{Li}_4\text{SnS}_4$  prepared by ball milling of  $\text{Li}_2\text{S}$ ,  $\text{SnS}_2$  and LiI.

Table S1 Ionic conductivities of  $x\text{LiI}\cdot(1-x)\text{Li}_4\text{SnS}_4$  at 25 °C and 60 °C.

| $x\text{LiI}\cdot(1-x)\text{Li}_4\text{SnS}_4$ | $\sigma_{25\text{ }^\circ\text{C}}/\text{S cm}^{-1}$ | $\sigma_{60\text{ }^\circ\text{C}}/\text{S cm}^{-1}$ |
|------------------------------------------------|------------------------------------------------------|------------------------------------------------------|
| $x = 0$                                        | $4.5 \times 10^{-5}$                                 | $1.4 \times 10^{-4}$                                 |
| $x = 0.40$                                     | $1.1 \times 10^{-4}$                                 | $4.0 \times 10^{-4}$                                 |
| $x = 0.41$                                     | $1.2 \times 10^{-4}$                                 | $3.9 \times 10^{-4}$                                 |
| $x = 0.42$                                     | $1.5 \times 10^{-4}$                                 | $4.2 \times 10^{-4}$                                 |
| $x = 0.43$                                     | $1.6 \times 10^{-4}$                                 | $4.9 \times 10^{-4}$                                 |
| $x = 0.44$                                     | $1.4 \times 10^{-4}$                                 | $4.4 \times 10^{-4}$                                 |
| $x = 0.45$                                     | $1.4 \times 10^{-4}$                                 | $4.6 \times 10^{-4}$                                 |
| $x = 0.50$                                     | $7.7 \times 10^{-5}$                                 | $4.2 \times 10^{-4}$                                 |

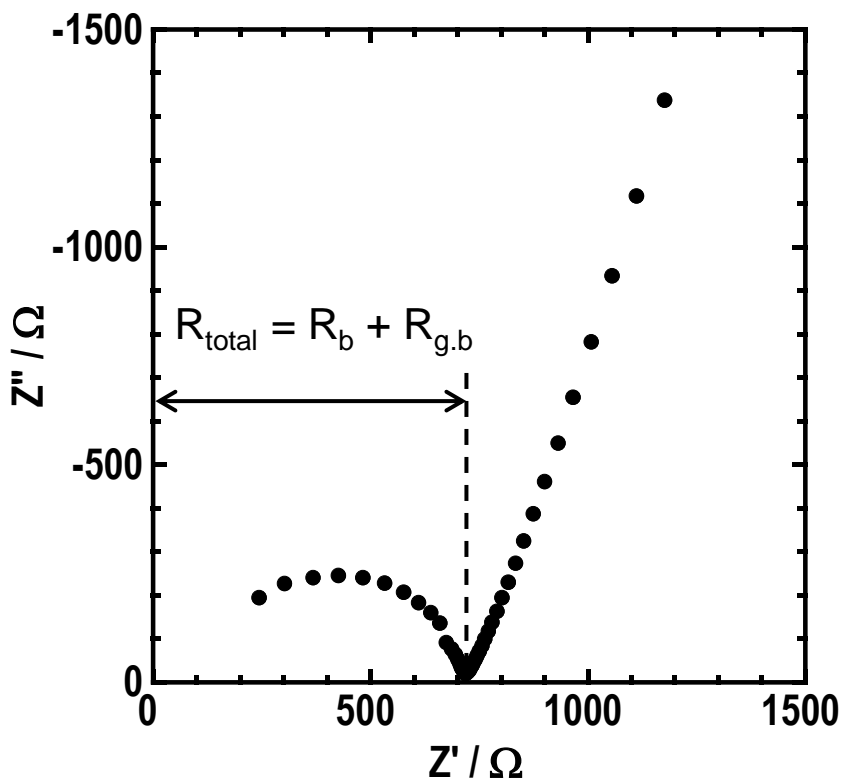

Fig. S2. Nyquist plots of  $0.43\text{Li}_2\text{S}\cdot 0.57\text{Li}_4\text{SnS}_4$  at  $25\text{ }^\circ\text{C}$ . The ionic conductivity was determined from the total resistance ( $R_{\text{total}} = R_b + R_{g.b}$ ).

## Preparation and characterization of solid electrolytes on $\text{Li}_2\text{S}$ – $\text{SnS}_2$ – $\text{LiI}$ system with various $\text{Li}_2\text{S}/\text{SnS}_2$ ratios of 67/33, 70/30 and 75/25.

The  $\text{Li}_2\text{S}$ – $\text{SnS}_2$  solid electrolytes were prepared with various  $\text{Li}_2\text{S}/\text{SnS}_2$  ratios of 67/33, 70/30 and 80/20. Note that the 67/33 sample is the same as  $\text{Li}_4\text{SnS}_4$ . Fig. S3a shows XRD patterns of these samples. The 67/33 and 70/30 samples exhibit the diffraction peaks of hexagonal  $\text{Li}_4\text{SnS}_4$  mainly. However, the diffraction peaks of  $\text{Li}_2\text{S}$  were observed in the 70/30 and 80/20 samples, indicating that all  $\text{Li}_2\text{S}$  was not used to reaction in the case of the ratio beyond 67/33. The ionic conductivities of these samples were measured by A.C. impedance (Table S2). The ionic conductivities of the 70/30 and 80/20 samples are lower than that of the 67/33 sample, suggesting that  $\text{Li}_2\text{S}$  decreased their ionic conductivities. Therefore, increasing the amount of  $\text{Li}_2\text{S}$  in the  $\text{Li}_2\text{S}$ – $\text{SnS}_2$  system is not an effective way to increase Li carrier and ionic conductivity.

Fig. S3b displays the XRD patterns of  $\text{LiI}$ -added  $67\text{Li}_2\text{S}\cdot 33\text{SnS}_2$ ,  $70\text{Li}_2\text{S}\cdot 30\text{SnS}_2$ , and  $80\text{Li}_2\text{S}\cdot 20\text{SnS}_2$ . The  $0.4\text{LiI}\cdot 0.6(80\text{Li}_2\text{S}\cdot 20\text{SnS}_2)$  still have the diffraction peaks of  $\text{Li}_2\text{S}$  while  $0.4\text{LiI}\cdot 0.6(70\text{Li}_2\text{S}\cdot 30\text{SnS}_2)$  has no peaks of  $\text{Li}_2\text{S}$ , indicating that  $\text{Li}_2\text{S}$  remained though  $\text{LiI}$  was added in the case of  $80\text{Li}_2\text{S}\cdot 20\text{SnS}_2$ . Addition of  $\text{LiI}$  also increases ionic conductivities of 70/30 and 80/20 samples, while the 67/33 sample with  $\text{LiI}$  shows the highest ionic conductivity. (Table S2)

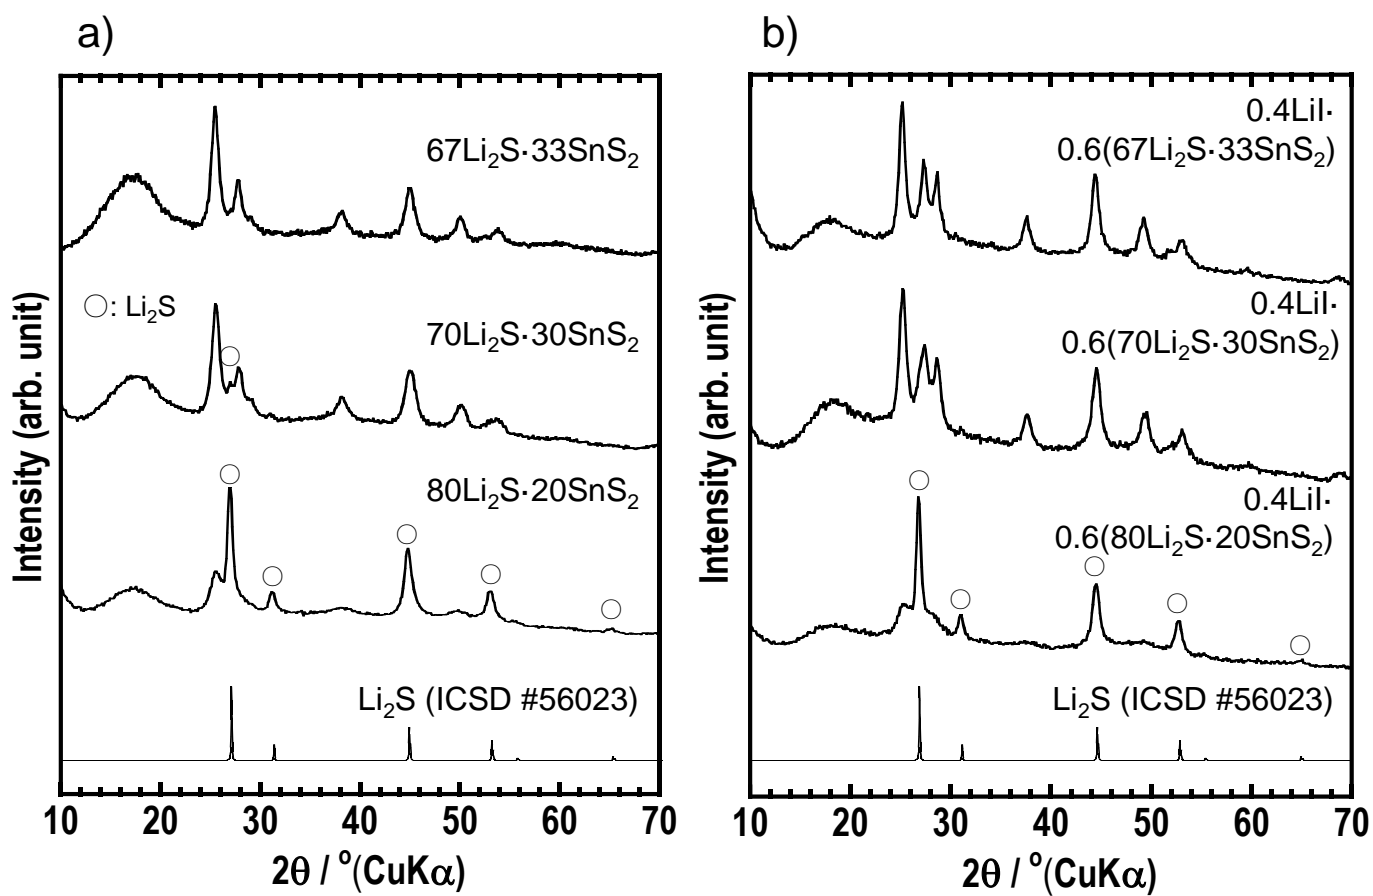

Fig. S3. XRD patterns of a)  $67\text{Li}_2\text{S}\cdot 33\text{SnS}_2$ ,  $70\text{Li}_2\text{S}\cdot 30\text{SnS}_2$  and  $80\text{Li}_2\text{S}\cdot 20\text{SnS}_2$  and b)  $\text{LiI}$ -added  $67\text{Li}_2\text{S}\cdot 33\text{SnS}_2$ ,  $70\text{Li}_2\text{S}\cdot 30\text{SnS}_2$  and  $80\text{Li}_2\text{S}\cdot 20\text{SnS}_2$ .

Table S2 Ionic conductivities at room temperature (25 °C) of 67Li<sub>2</sub>S·33SnS<sub>2</sub>, 70Li<sub>2</sub>S·30SnS<sub>2</sub> and 80Li<sub>2</sub>S·20SnS<sub>2</sub> solid electrolytes with and without 0.4 mol LiI.

|                                        | without LiI (S cm <sup>-1</sup> ) | with LiI (S cm <sup>-1</sup> ) |
|----------------------------------------|-----------------------------------|--------------------------------|
| 67Li <sub>2</sub> S·33SnS <sub>2</sub> | 4.5 × 10 <sup>-5</sup>            | 1.1 × 10 <sup>-4</sup>         |
| 70Li <sub>2</sub> S·30SnS <sub>2</sub> | 4.2 × 10 <sup>-5</sup>            | 7.3 × 10 <sup>-5</sup>         |
| 80Li <sub>2</sub> S·20SnS <sub>2</sub> | 1.9 × 10 <sup>-5</sup>            | 5.8 × 10 <sup>-5</sup>         |

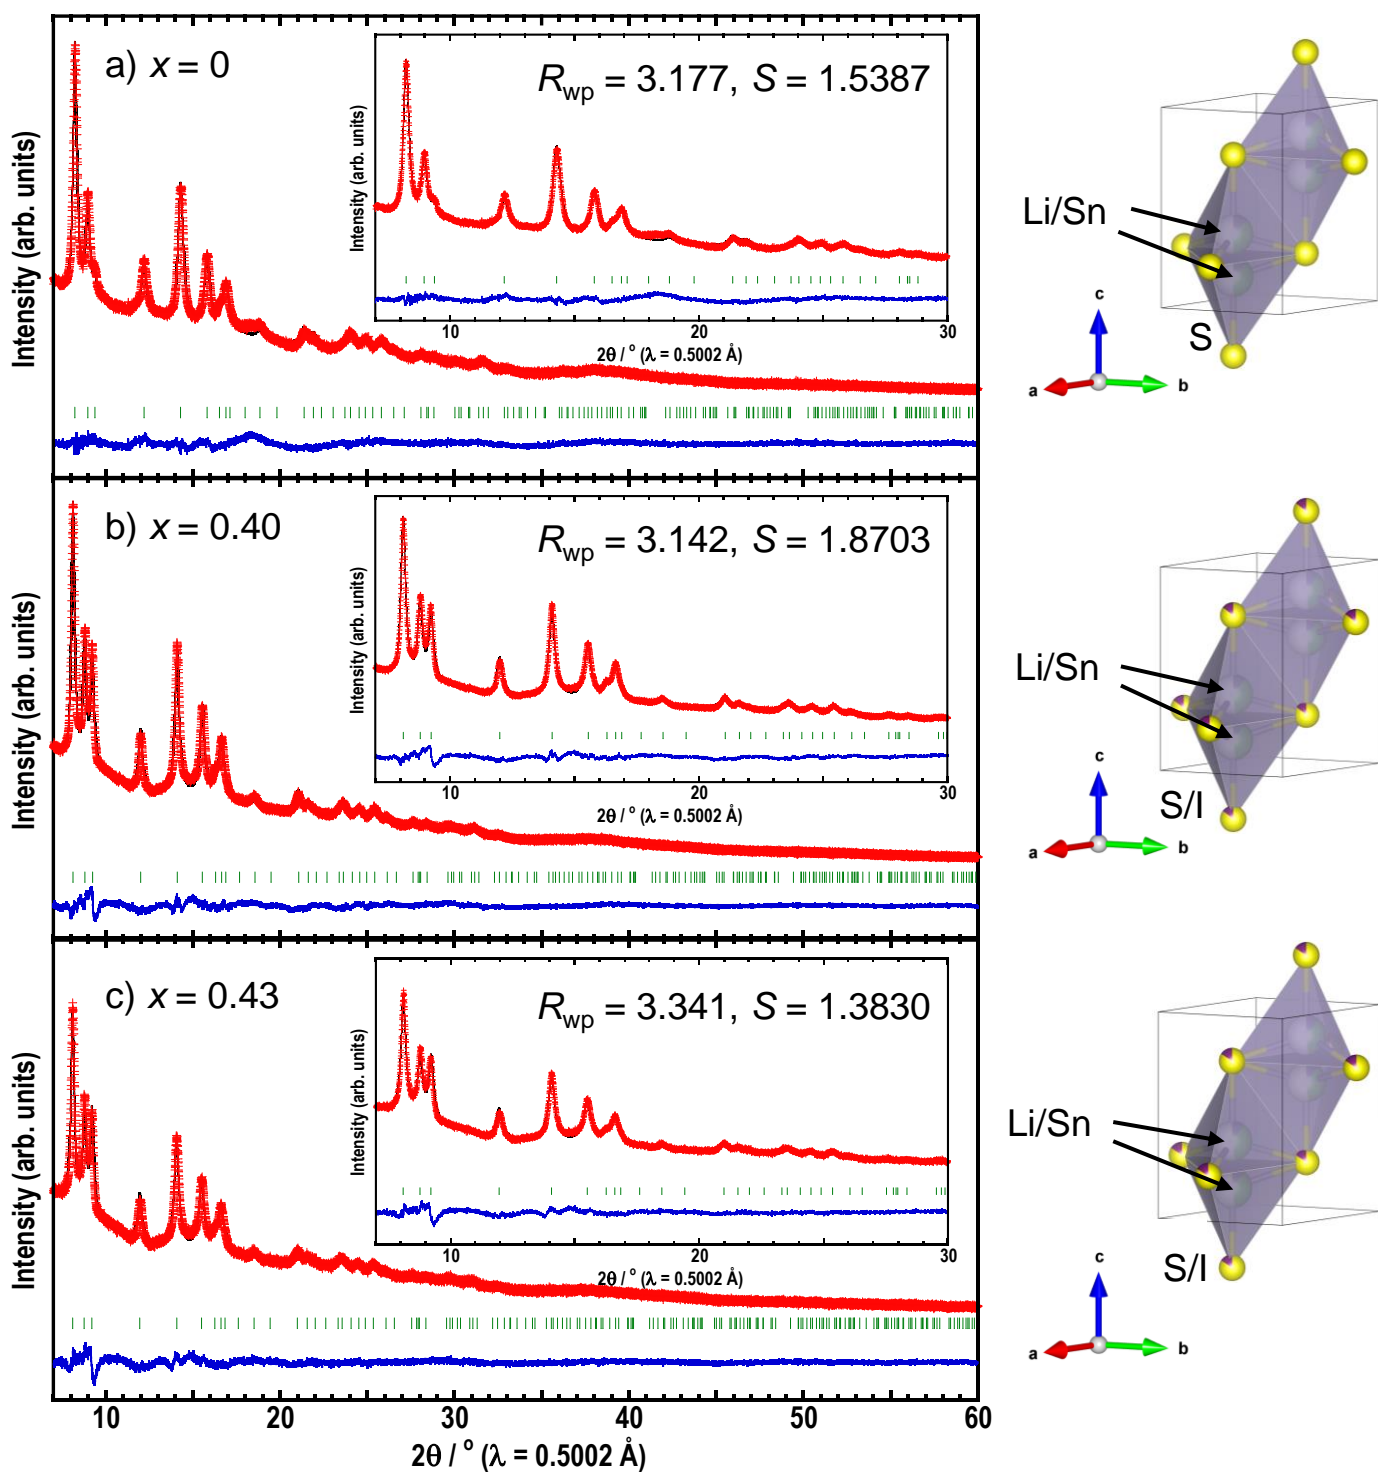

Fig. S4. Synchrotron XRD patterns and structures of a)  $x = 0$ , b)  $x = 0.40$  and c)  $x = 0.43$  in  $x\text{Li}\cdot(1-x)\text{Li}_4\text{SnS}_4$ . The red crosses, black continuous line, and bottom blue line represents the observed, calculated, and difference patterns, respectively. Bottom vertical green bars are the Bragg positions.



Table S3 Crystallographic data of  $\text{Li}_4\text{SnS}_4$ .Space group:  $P6_3/mmc$  (No.194),  $a = b = 4.0174(6)$  Å,  $c = 6.3935(9)$  Å,  $V = 89.36(2)$  Å<sup>3</sup>

| atom | site | g     | x   | y   | z           | B (Å <sup>2</sup> ) |
|------|------|-------|-----|-----|-------------|---------------------|
| S    | 2c   | 1     | 1/3 | 2/3 | 1/4         | 2.58(6)             |
| Sn   | 4f   | 0.125 | 2/3 | 1/3 | 0.14372(17) | =S                  |
| Li   | 4f   | 0.375 | 2/3 | 1/3 | =Sn         | =S                  |

Reliability parameters:  $R_{\text{wp}} = 3.177$ ,  $S = 1.5387$ Table S4 Crystallographic data of  $0.4\text{Li}\cdot 0.6\text{Li}_4\text{SnS}_4$ .Space group:  $P6_3/mmc$  (No.194),  $a = b = 4.07114(18)$  Å,  $c = 6.5076(4)$  Å,  $V = 93.409(8)$  Å<sup>3</sup>

| atom | site | g     | x   | y   | z           | B (Å <sup>2</sup> ) |
|------|------|-------|-----|-----|-------------|---------------------|
| S    | 2c   | 0.857 | 1/3 | 2/3 | 1/4         | 1.61(3)             |
| I    | 2c   | 0.143 | 1/3 | 2/3 | 1/4         | =S                  |
| Sn   | 4f   | 0.107 | 2/3 | 1/3 | 0.13750(19) | =S                  |
| Li   | 4f   | 0.375 | 2/3 | 1/3 | =Sn         | =S                  |

Reliability parameters:  $R_{\text{wp}} = 3.142$ ,  $S = 1.8703$ Table S5 Crystallographic data of  $0.43\text{Li}\cdot 0.57\text{Li}_4\text{SnS}_4$ .Space group:  $P6_3/mmc$  (No.194),  $a = b = 4.0822(7)$  Å,  $c = 6.5311(9)$  Å,  $V = 94.26(2)$  Å<sup>3</sup>

| atom | site | g     | x   | y   | z         | B (Å <sup>2</sup> ) |
|------|------|-------|-----|-----|-----------|---------------------|
| S    | 2c   | 0.841 | 1/3 | 2/3 | 1/4       | 1.44(7)             |
| I    | 2c   | 0.159 | 1/3 | 2/3 | 1/4       | =S                  |
| Sn   | 4f   | 0.105 | 2/3 | 1/3 | 0.1363(3) | =S                  |
| Li   | 4f   | 0.375 | 2/3 | 1/3 | =Sn       | =S                  |

Reliability parameters:  $R_{\text{wp}} = 3.341$ ,  $S = 1.3830$

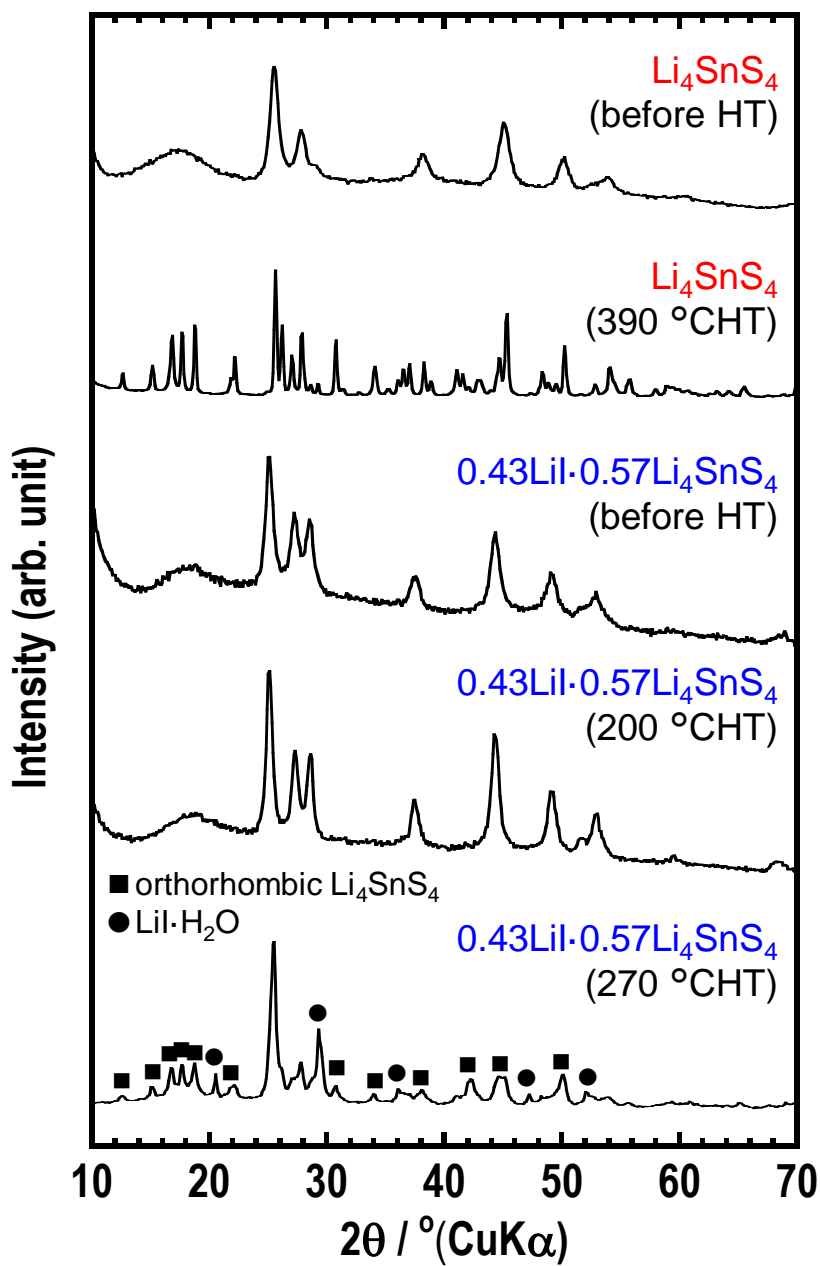

Fig. S5. XRD patterns of  $x = 0$  and  $x = 0.43$  in  $x\text{LiI}\cdot(1-x)\text{Li}_4\text{SnS}_4$  before and after the heat treatment (HT). The  $x = 0$  and  $x = 0.43$  were heated at 390 °C and 200 °C/270 °C, respectively.

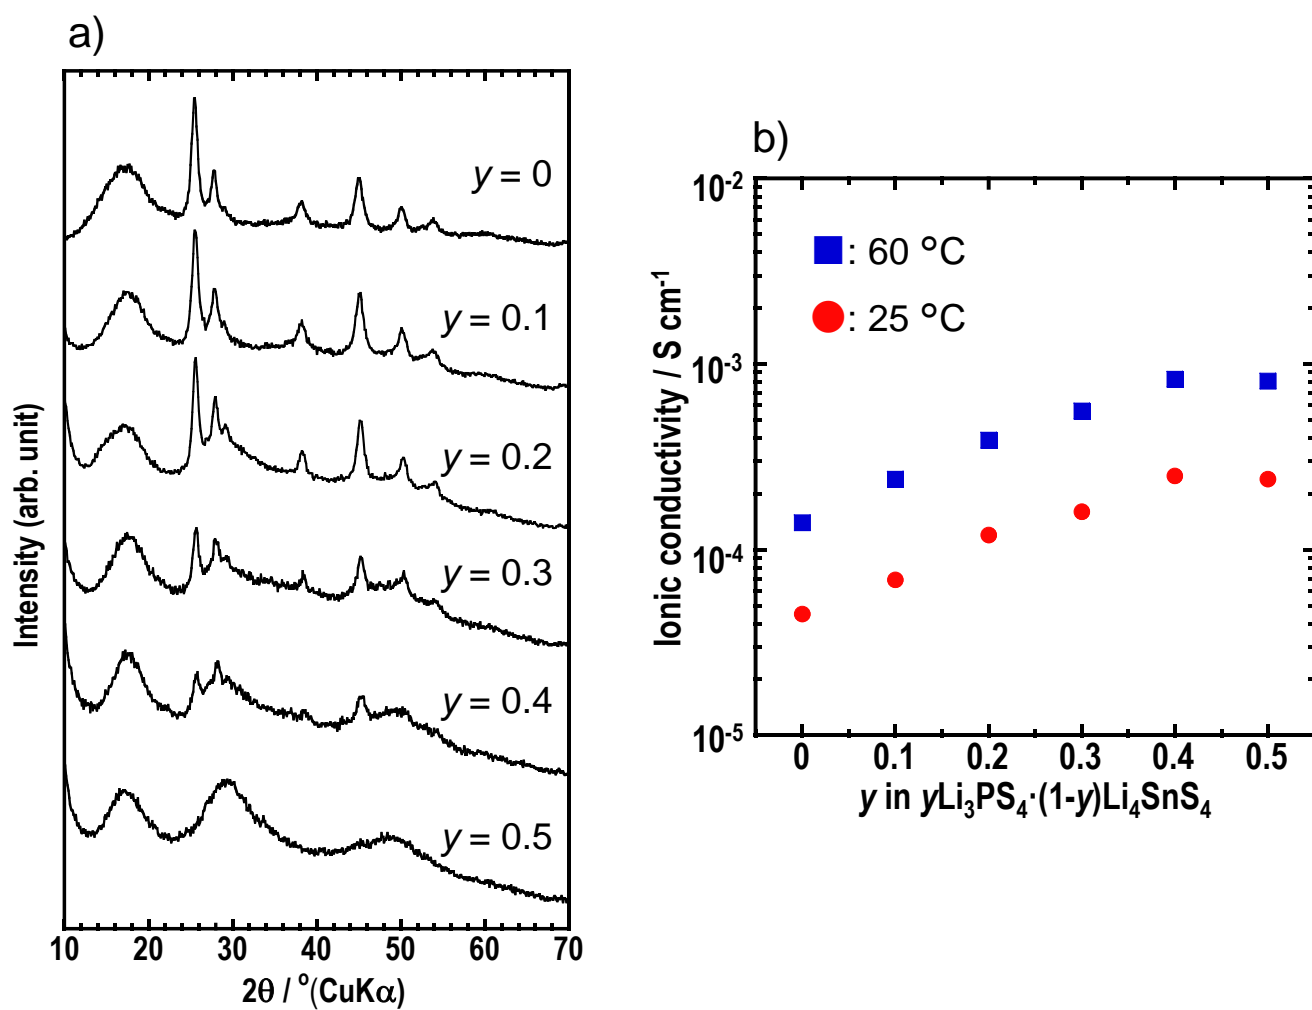

Fig. S6. a) XRD patterns and b) ionic conductivities at 25 °C and 60 °C of  $y = 0-0.5$  in  $y\text{Li}_3\text{PS}_4 \cdot (1-y)\text{Li}_4\text{SnS}_4$ .

Table S6 The activation energies and ionic conductivities at 30 °C of  $x = 0$  and  $x = 0.43$  in  $x\text{LiI} \cdot (1-x)\text{Li}_4\text{SnS}_4$ ,  $z = 0.37$ ,  $z = 0.37$  (200 °C HT) and  $z = 0.43$  in  $z\text{LiI} \cdot (1-z)(0.4\text{Li}_3\text{PS}_4 \cdot 0.6\text{Li}_4\text{SnS}_4)$ , and  $0.4\text{LiI} \cdot 0.6\text{Li}_4\text{SnS}_4$  glass prepared liquid-phase synthesis.

|                                                                                                      | $E_a / \text{kJ mol}^{-1}$ | $\sigma_{30\text{ }^\circ\text{C}} / \text{S cm}^{-1}$ |
|------------------------------------------------------------------------------------------------------|----------------------------|--------------------------------------------------------|
| $\text{Li}_4\text{SnS}_4$                                                                            | 37                         | $3.7 \times 10^{-5}$                                   |
| $0.43\text{LiI} \cdot 0.57\text{Li}_4\text{SnS}_4$                                                   | 39                         | $1.0 \times 10^{-4}$                                   |
| $0.37\text{LiI} \cdot 0.63(0.4\text{Li}_3\text{PS}_4 \cdot 0.6\text{Li}_4\text{SnS}_4)$              | 33                         | $4.4 \times 10^{-4}$                                   |
| $0.37\text{LiI} \cdot 0.63(0.4\text{Li}_3\text{PS}_4 \cdot 0.6\text{Li}_4\text{SnS}_4)$<br>200 °C HT | 28                         | $5.5 \times 10^{-4}$                                   |
| $0.43\text{LiI} \cdot 0.57(0.4\text{Li}_3\text{PS}_4 \cdot 0.6\text{Li}_4\text{SnS}_4)$              | 32                         | $5.5 \times 10^{-4}$                                   |
| $0.4\text{LiI} \cdot 0.6\text{Li}_4\text{SnS}_4$ glass<br>(Liquid-phase synthesis)*                  | 41.6                       | $4.1 \times 10^{-4}$                                   |

\*data from the reference [12] “K. H. Park, D. Y. Oh, Y. E. Choi, Y. J. Nam, L. Han, J. Y. Kim, H. Xin, F. Lin, S. M. Oh and Y. S. Jung, *Adv. Mater.*, 2016, **28**, 1874–1883.”

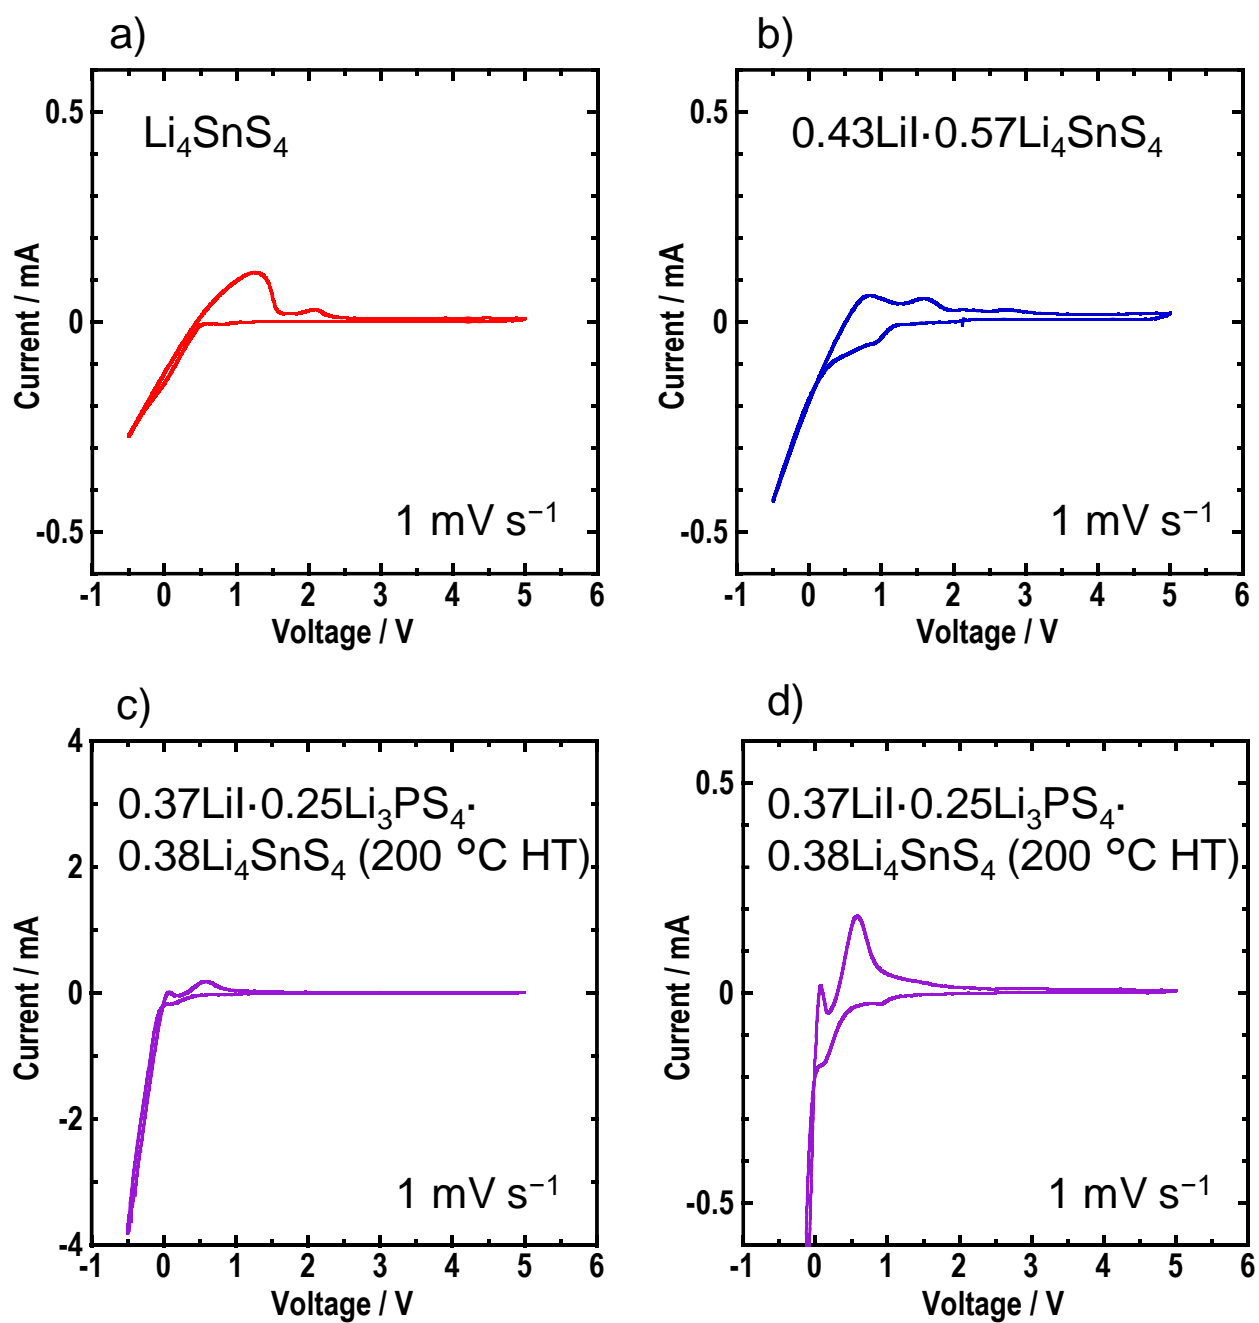

Fig. S7. Cyclic voltammograms of the Li/solid electrolytes/SUS asymmetric cells using a)  $\text{Li}_4\text{SnS}_4$ , b)  $0.43\text{LiI}\cdot 0.57\text{Li}_4\text{SnS}_4$ , and c)  $0.37\text{LiI}\cdot 0.25\text{Li}_3\text{PS}_4\cdot 0.38\text{Li}_4\text{SnS}_4$  heated at  $200\text{ }^\circ\text{C}$  as solid electrolytes from  $-0.5$  to  $5$  V. The scan rate was  $1\text{ mV s}^{-1}$ . d) An enlarged view of Fig. S7c with a current range of  $-0.6$  and  $0.6$  mA.

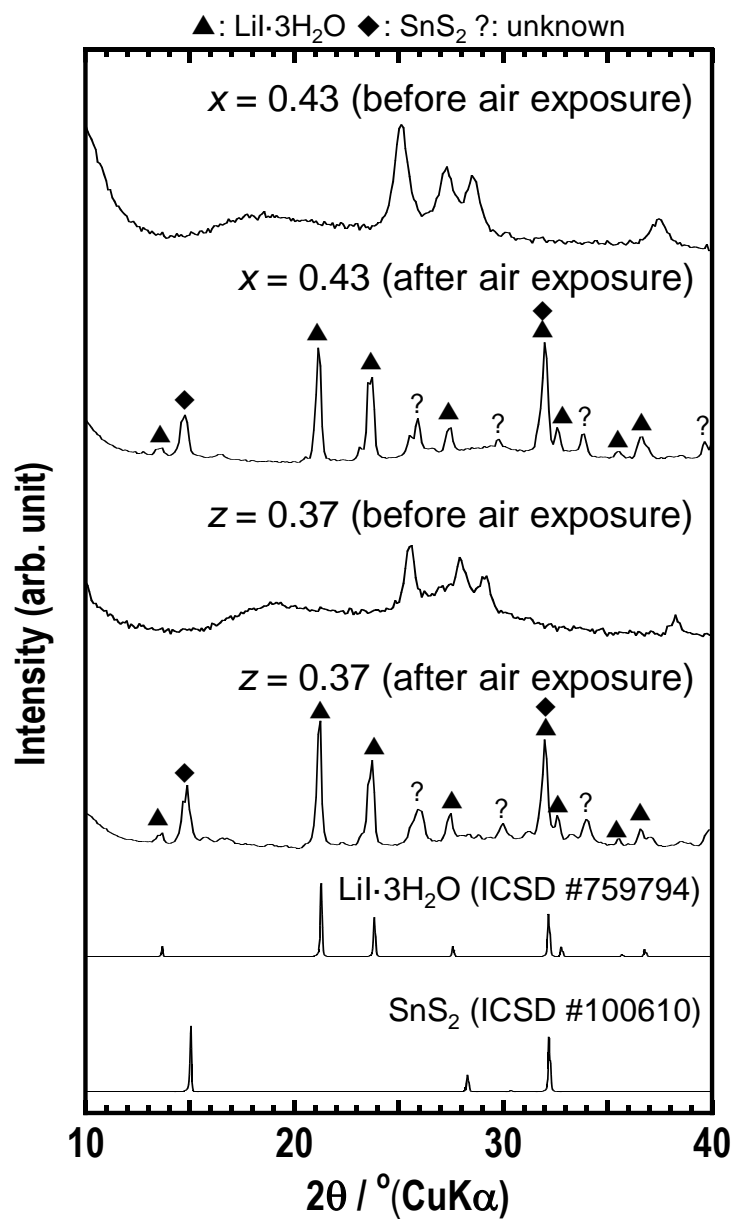

Fig. S8. XRD patterns of  $x = 0.43$  in  $x\text{LiI} \cdot (1-x)\text{Li}_4\text{SnS}_4$  and  $z = 0.37$  in  $z\text{LiI} \cdot (1-z)(0.4\text{Li}_3\text{PS}_4 \cdot 0.6\text{Li}_4\text{SnS}_4)$  before and after the air exposure.
